# Supplementary material
Source: HighWire-hosted journal article supplement (https://www.genetics.org/content/suppl/2012/11/19/genetics.112.143354)
Supplement: genetics.112.143354-2.pdf [file genetics.112.143354-2.pdf]

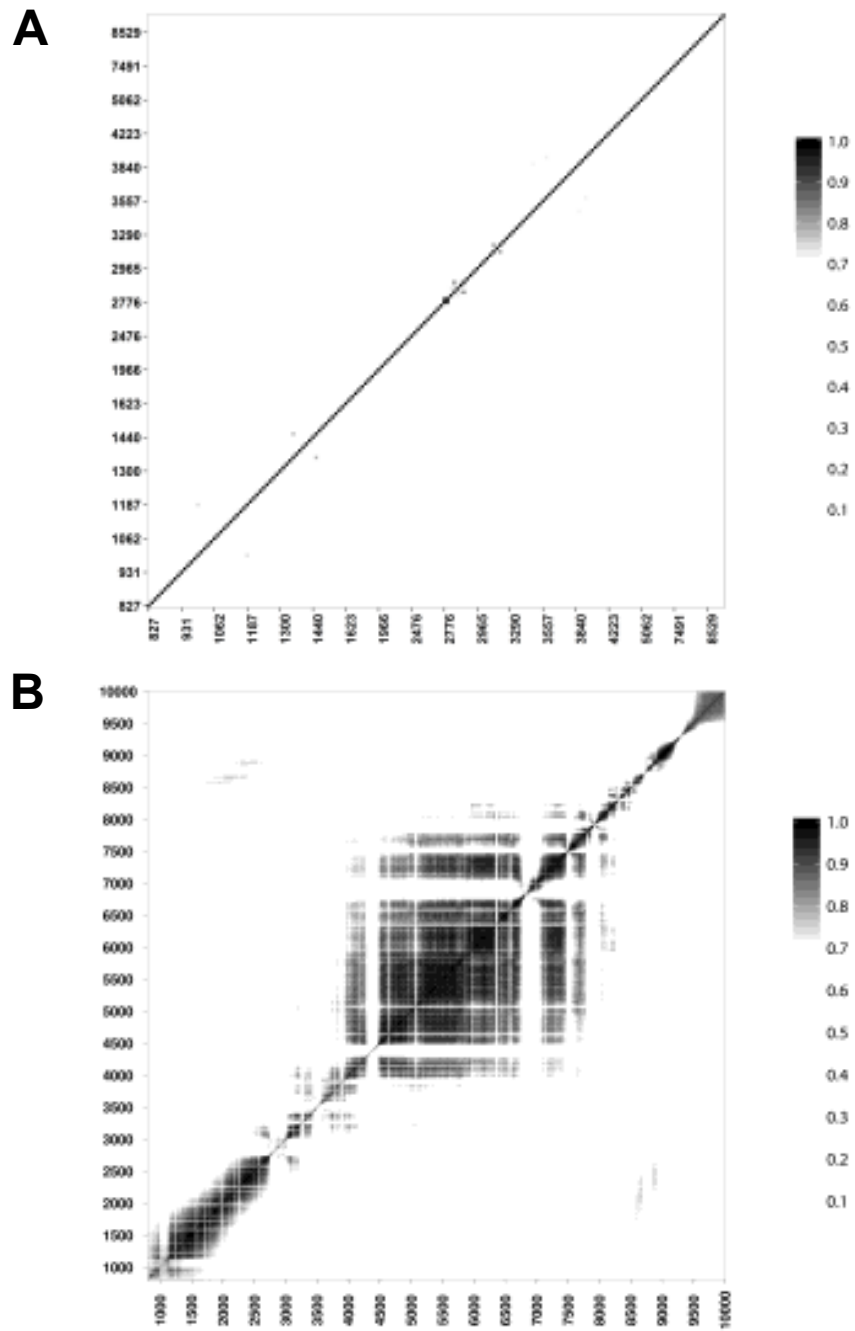

**Figure S4** Pairwise correlation of AUC- and m/z-spectra in F2 animals. (A) Pearson correlation coefficients ( $R^2$ ) for AUC-peaks. (B) Pearson correlation coefficients ( $R^2$ ) for m/z-spectra.  $R^2 > 0.7$  are highlighted in grey.
